# Supplementary material for: Kras promotes myeloid differentiation through Wnt/β‐catenin signaling
Source: PubMed Central journal article supplement (PMC6996383; doi:10.1096/fba.2019-00004), 2019-07-01

Figure S1 *Yokoyama et al.*

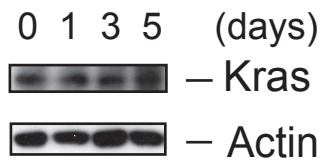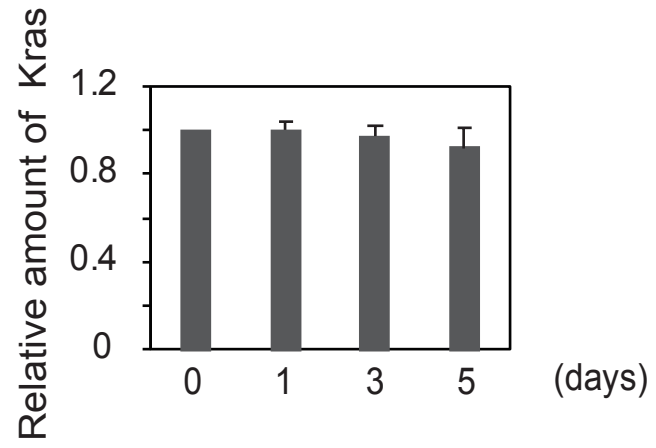

Figure S2 *Yokoyama et al.*

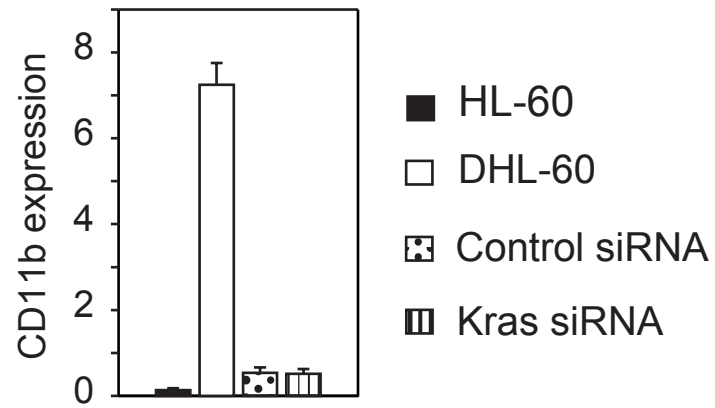

Figure S3 Yokoyama et al.

A

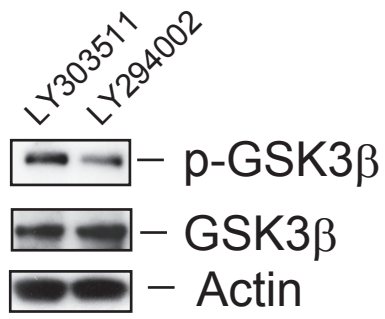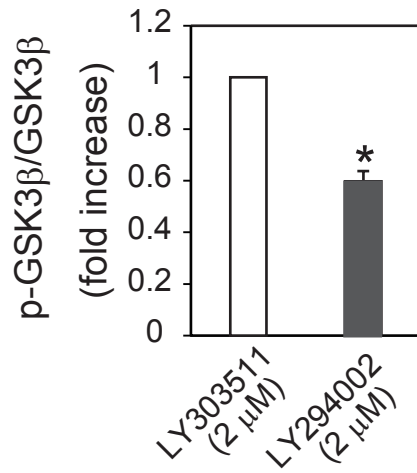

B

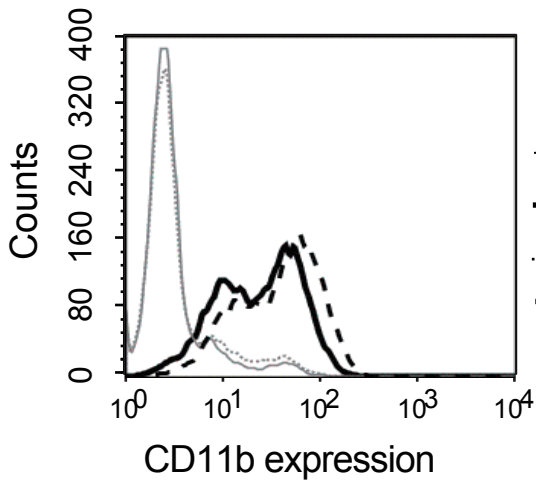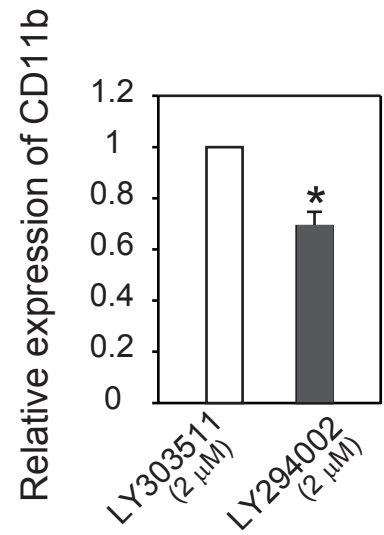

Figure S4 *Yokoyama et al.*

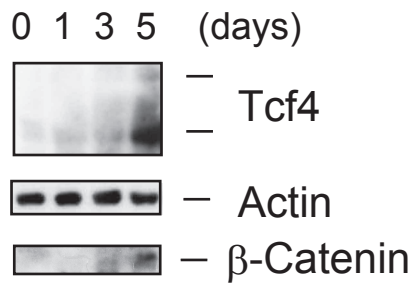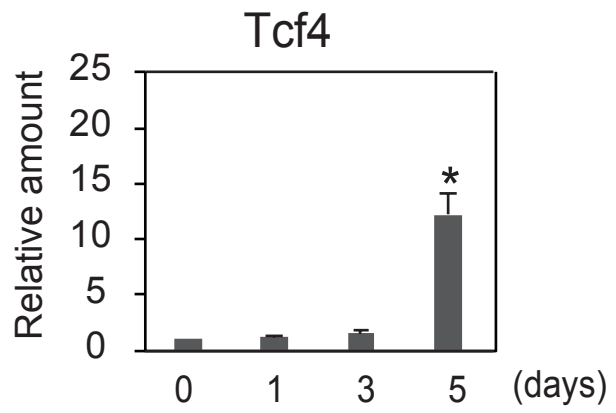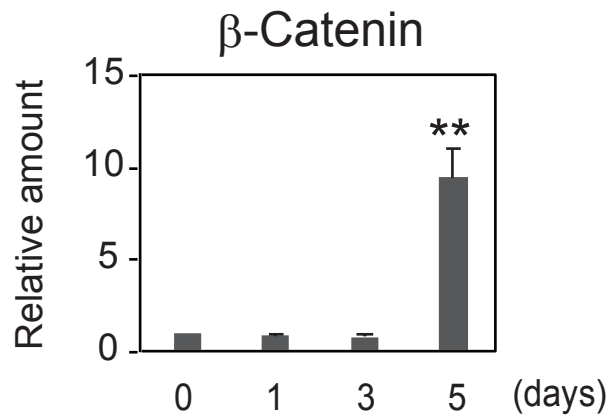

Supplement: FBA2-1-435-s001.pdf [file FBA2-1-435-s001.pdf]
